# Supplementary material for: Patient-reported outcomes after switching from brand-name to generic drospirenone/ethinylestradiol combined oral contraceptives: a questionnaire-based observational study
Source: Research Square preprint supplement (doi:10.21203/rs.3.rs-8735703/v1), 2026-02-09
Supplement: Supplementary file 1 [file 936c025876cd18b70908ee8a.docx]

Supplementary File 1. Patient questionnaire used in this study

Questionnaire used to assess patient-reported outcomes after switching from a brand-name to a generic drospirenone/ethinylestradiol low-dose estrogen–progestin (LEP) formulation. The questionnaire was administered after completion of three cycles of the generic product and included six predefined symptom domains (gastrointestinal symptoms, nausea/vomiting, irregular bleeding, dysmenorrhea, premenstrual syndrome, and headache), each rated as “improved,” “unchanged,” or “worsened,” as well as a free-text section for additional comments. The original Japanese version and its English translation are provided.

**Patient Questionnaire on Switching from Brand-name to Generic Drospirenone/Ethinylestradiol LEP/COC**

**Instructions to participants**

This questionnaire asks about your experience after switching from a **brand-name** to a **generic** drospirenone/ethinylestradiol low-dose estrogen–progestin (LEP) / combined oral contraceptive (COC).
Please answer based on your experience **after at least three cycles of the generic product**.
There are no right or wrong answers. Please select the option that best reflects your experience.

**Section 1. Background information**

1. **Age:** ____ years
2. **Marital status:**
   ☐ Married
   ☐ Unmarried
3. **History of childbirth:**
   ☐ Yes
   ☐ No
   If yes, number of deliveries: ____

**Section 2. Overall impression after switching**

1. After switching from the brand-name to the generic formulation, did you notice **any difference in your overall experience**?
   ☐ No, I noticed no difference
   ☐ Yes, I noticed some difference

**Section 3. Changes in specific symptoms**

Please indicate how each of the following symptoms changed **after switching to the generic product**, compared with the brand-name product.

For each item, select **one** response.

**3-1. Gastrointestinal symptoms**

(e.g., upper abdominal discomfort, bloating, constipation, diarrhea, loss of appetite)
☐ Improved
☐ Worsened
☐ No change

**3-2. Nausea and/or vomiting**

☐ Improved
☐ Worsened
☐ No change

**3-3. Irregular bleeding (breakthrough bleeding or spotting)**

☐ Improved
☐ Worsened
☐ No change

**3-4. Menstrual pain (dysmenorrhea)**

☐ Improved
☐ Worsened
☐ No change

**3-5. Premenstrual syndrome (PMS) symptoms**

(e.g., mood changes, irritability, breast tenderness, bloating)
☐ Improved
☐ Worsened
☐ No change

**3-6. Headache**

☐ Improved
☐ Worsened
☐ No change

**Section 4. Free-text comments (optional)**

1. If you noticed any **other differences** after switching to the generic product (positive or negative), please describe them briefly.
   (For example: usability of the package, mood changes, skin condition, overall satisfaction.)

**Section 5. Continuation preference**

1. After using the generic formulation, which option best describes your preference?
   ☐ I would like to continue using the generic formulation
   ☐ I would prefer to return to the brand-name formulation

**Notes for publication (not shown to participants)**

- This questionnaire was administered after at least **three cycles** of generic LEP/COC use.
- Responses were categorized as *improved*, *worsened*, or *unchanged* for statistical analysis.
- Free-text responses were analyzed descriptively.
